# Supplementary material
Source: PubMed Central journal article supplement (PMC1791009)
Supplement: NIHMS14778-supplement-01.pdf [file NIHMS14778-supplement-01.pdf]

Supplementary table 1. The 30 sequences selected for experimental confirmation

| No.            | SAGE tag       | 3' EST   | Length      | Mapped to genome (NCBI 34) |        |                |                |                   |               | Real time PCR primers           |                                   |
|----------------|----------------|----------|-------------|----------------------------|--------|----------------|----------------|-------------------|---------------|---------------------------------|-----------------------------------|
|                |                |          |             | Chr                        | Strand | Start          | End            | Annotation        | Accession no. | Sense                           | Antisense                         |
| <b>Control</b> |                |          | <b>1793</b> | <b>chr7</b>                | -      | <b>5533308</b> | <b>5536748</b> | <b>ACTB</b>       | NM_001101     | b-actin: ACTTCGAGCAAGAGATGGCCAC | b-actin: ACTGTGTTGGCGTACAGGTCTTTG |
| 1              | CATGTGCCACTACG | DR978861 | 110         | chr19                      | -      | 13742169       | 13742274       | Antisense         | NM_032285     | GTGCCACTACGCTGGCTAATTTTT        | ATCGCTTGAGGTCAGGCGTT              |
| 2              | CATGGCGAGATGTT | DR978181 | 170         | chr2                       | +      | 148521607      | 148521769      | Antisense         | AK128860      | TGGCGAGATGTTGTTAGTGGA           | TGCATATCATACCAAATGT               |
| 3              | CATGGTACACCCGG | DR980720 | 96          | chr21                      | +      | 43395074       | 43395170       | Antisense         | NM_006758     | ACACCCGGTCTGATTACACTTTCTT       | AGAAGGATCGGAAAAGAGCAAATGT         |
| 4              | CATGTACGAAGAGA | DY633389 | 260         | chr6                       | +      | 33338596       | 33338856       | Antisense         | NM_022553     | CGAAGAGATAGAAGGATGGCTACCA       | TCCTCTCAAGCATTTATCCTTTGTG         |
| 5              | CATGCGACGTACTA | DR980985 | 109         | chrX                       | +      | 41276008       | 41280833       | Antisense         | NM_003688     | ATGCGACGTACTAGTCTTTGGCACT       | CAAGGAAAGATCGTTTGAAGGCA           |
| 6              | CATGATACCGGGCA | DR979498 | 279         | chr1                       | -      | 1662231        | 1662502        | Upstream exon     | AF070630      | TGATACCGGGCAAGGGGAA             | TTATTGAAAGGATCGGAAAAGCGT          |
| 7              | CATGGCCGGGACTA | DR978161 | 171         | chr12                      | -      | 119660020      | 119660192      | Upstream exon     | BM687420      | GGACTAGGTGATGCGAAGAACAGAA       | GGCTTTAGCTGCTTATTGGCTAGA          |
| 8              | CATGACCGGTTCAA | DR977597 | 220         | chr19                      | +      | 43906651       | 43912610       | Upstream exon     | NM_004924     | ATGACCGGTTCAATCCACCCT           | AAAATCTGAGACACGTGAGGCCA           |
| 9              | CATGTACCCCGAT  | DR980876 | 235         | chr20                      | -      | 20319288       | 20319534       | Upstream exon     | AY007097      | CGATACAGCCAGCAGTTTGGTG          | AAAAACAACCTCCAGTCCACGTGATC        |
| 10             | CATGATCGAAGACT | DR979502 | 232         | chr8                       | -      | 27522386       | 27524006       | Upstream exon     | NM_203339     | ATCGAAGACTTGCTGCTGTTTGTG        | GCTTCTTAGGTTGCTGAGCAGTG           |
| 11             | CATGTCAGCGGTAG | DR978736 | 249         | chr16                      | +      | 70520162       | 70520411       | Downstream 3'-end | NM_014761     | AGCGGTAGTGTTCAGTCTTTCCCT        | CAGGATCTTTAACTTTATTAGCAGC         |
| 12             | CATGCGTAAAGTCT | DR977917 | 126         | chr4                       | +      | 523185         | 523312         | Downstream 3'-end | NM_017733     | CATGCGTAAAGTCTCTGTTATTCTAAAATG  | AACTATTTACTGCTTAGTCTAAAATTCAGG    |
| 13             | CATGTTACGACTAA | DR978950 | 157         | chrX                       | -      | 52838594       | 52838752       | Downstream 3'-end | CR749619      | CATGTTACGACTAAGAACAGAAGACCA     | TGAACCTCTCATTGCCAGCATA            |
| 14             | CATGTAGCGCCAC  | DR980934 | 316         | chr12                      | -      | 67526785       | 67527095       | Upstream 5'-end   | BM008399      | ATACTCCAGCTGGGTGACAGAAT         | GCTTATTGTAGTGGGAAGTTCAAAGTC       |
| 15             | CATGTGTTATACCG | DR978919 | 204         | chr9                       | -      | 110271043      | 110271833      | Upstream 5'-end   | AK075235      | GCTATTTCCGAAAATGGTTGCA          | ACACTTCACTGGTTCACACACAGGA         |
| 16             | CATGAGCGGATATA | DR979332 | 231         | chr13                      | -      | 23248057       | 23248289       | Intronic          | NM_005932     | GATATAGCCCGAGGCAAAAAGTTAAG      | GGTAAATGTGTTGCTGAGAGAAGAATAAAA    |
| 17             | CATGCCGCCATTAG | DR977754 | 169         | chr16                      | -      | 47190581       | 47190753       | Intronic          | NM_153029     | TGCCGCCATTAGTTTTAGGAGTTC        | TAACACCTCGATTCCCACTGCC            |
| 18             | CATGACCGGTCAGG | DR979161 | 97          | chr3                       | +      | 180406837      | 180406935      | Intronic          | NM_006218     | CGGTCAGGCTTTTTAAATCTTTGC        | GCTACAACCACCCCACTAATCAGTG         |
| 19             | CATGCCCGGTTAA  | DR979782 | 255         | chr5                       | -      | 66948767       | 66949023       | Intronic          | BF675045      | ATGCCCGGTTAACATAGCATAAC         | AATTTGGGCTCCAGGGCC                |
| 20             | CATGTTATTAGACG | DR978688 | 89          | chrX                       | -      | 148842552      | 148842642      | Intronic          | U66047        | CATGTTATTAGACGTCATTGTACAAAATTC  | TTGAATTAATGTGAGCATCAGTGAGG        |
| 21             | CATGAGTGACGCAC | DR978587 | 145         | chr1                       | +      | 31910657       | 31910802       | Intergenic        | --            | GCACCCAAATAGTCCCTCCTACTTG       | GAGACAGGTTCTCACTCTTGTGGCC         |
| 22             | CATGACGAGGGAT  | DR979141 | 142         | chr11                      | +      | 92181006       | 92181142       | Intergenic        | --            | GGGATTTGTAATCCGGTAGGGAA         | AGTTACATCTCATCTGTGCCAGA           |
| 23             | CATGGTATTGGTCC | DR980739 | 125         | chr12                      | +      | 16860138       | 16860264       | Intergenic        | --            | TATTGGTCCGGCGATGAGTTTT          | GATTATTGCTTCGTTGGCTGTGAA          |
| 24             | CATGCCCGTGAAGA | DR980060 | 261         | chr9                       | -      | 115433296      | 115433557      | Intergenic        | --            | AAGAATTGCTCTGCCTGGCAGT          | CACAAAACACACTTTTGCAAAGACC         |
| 25             | CATGGGAGACCGTA | DR980629 | 180         | chr18                      | -      | 17356860       | 17357042       | Intergenic        | --            | TGGGAGACCGTACTTAAGTAATTGC       | AATCACTGTGGAGCAAAGTGCAAC          |
| 26             | CATGGAGCGATTCT | DR980429 | 236         | chr16                      | -      | 3425104        | 3425342        | Intergenic        | --            | TTCTTGTGCTTGCATCCTGGAA          | AGATGGAGAGGAAATGTTATGGGTG         |
| 27             | CATGCTAATGCGGG | DR977977 | 196         | chr5                       | -      | 177489903      | 177490100      | Intergenic        | --            | TAATGCGGGGAAACTCCAGTA           | AAGCATCACTTCATATTTCAAGAGCTCTC     |
| 28             | CATGATCGCTTGGG | DR977682 | 165         | chr6                       | -      | 41840010       | 41840176       | Intergenic        | --            | ATGATCGCTTGGGGACCCT             | TACATTTATTTTCCCCCAGAGAGCC         |
| 29             | CATGCGGTAATCCC | DR980161 | 280         | chr10                      | +      | 94968813       | 94969095       | Intergenic        | --            | ATGCGGTAATCCCACACTTTGG          | TGATCTTGCTCTGCCACTGGAG            |
| 30             | CATGCTCAAGCGGT | DR980291 | 99          | chrX                       | -      | 50555824       | 50555915       | Intergenic        | --            | TCAAGCGGTAACAAGATGGAGG          | CCAACCCCAACCAACTATCACT            |
