# Supplementary material
Source: PubMed Central journal article supplement (PMC1791009)
Supplement: NIHMS14778-supplement-02.pdf [file NIHMS14778-supplement-02.pdf]

Supplementary table 2. List of genomic tags (NCBI 34)

| No. | Tag sequences  | Location in human X chromosome |
|-----|----------------|--------------------------------|
| 1   | GTCTACGCTTGCGT | chrX:29623156-29623169         |
| 2   | ACCTATACCGGAGA | chrX:48268562-48268575         |
| 3   | CATTCGATAAGCA  | chr2:122443650-122443663       |
| 4   | CTTAACCAACGTCT | chrX:63814178-63814191         |
| 5   | TTTTCGTCCAAGTA | chrX:97373779-97373792         |
| 6   | GGGTACGCTAATGA | chrX:103968661-103968674       |
| 7   | AACTTAGTCGAATA | chrX:122284255-122284268       |
| 8   | GCAATTCGTTAGGT | chrX:124056365-124056378       |
| 9   | GACTCCGATATCTT | chrX:128303454-128303467       |
| 10  | AAGTACGCTAGAC  | chrX:128303895-128303908       |
| 11  | ATACTAGCGCTCCT | chrX:128304281-128304294       |
| 12  | AGGGTATCGCCAC  | chrX:150550634-150550647       |
| 13  | TATCCTCGCATATG | chrX:16990706-16990719         |
| 14  | CTGATCTACGTCTG | chrX:16991753-16991766         |
| 15  | TTCTAGCGAACCAT | chrX:13577940-13577953         |
| 16  | GCGTTACGGTTATG | chrX:590476-590489             |
| 17  | CTACCTATCGTTGT | chrX:9730632-9730645           |
| 18  | AGTCAGTCTAGACG | chrX:27259470-27259483         |
| 19  | ATCCATTACGCGGC | chrX:590840-590853             |
| 20  | ATAAGCCGCGGAT  | chrX:9729090-9729103           |
| 21  | GCCATCGTTTTGAA | chrX:32875787-32875800         |
| 22  | CTTTAGCAACGGGC | chrX:32875824-32875837         |
| 23  | TATACGTCATTAGC | chrX:32876207-32876220         |
| 24  | CACTTTATCGTATT | chrX:591158-591171             |
| 25  | TGACATTCGTACCC | chrX:16995050-16995063         |
| 26  | CCCGATCTCTAGAG | chrX:27259376-27259389         |
| 27  | TCAAAGTCGGCTTA | chrX:125424897-125424910       |
| 28  | TCCTATTCGCCACC | chrX:131253582-131253595       |
| 29  | TCTTCGGTAAGTTT | chrX:131258195-131258208       |
| 30  | TAACTACCGAGTTG | chrX:140959480-140959493       |
